# Supplementary material for: HtrA2 deficiency causes mitochondrial uncoupling through the F1F0-ATP synthase and consequent ATP depletion
Source: PubMed Central journal article supplement — Cell Death Dis. 2012 Jun 28;3(6):e335–. doi: 10.1038/cddis.2012.77 (PMC3388244; doi:10.1038/cddis.2012.77), 2012-06-28
Supplement: cddis201277x1.pdf [file cddis201277x1.pdf]

## Supplementary figure 1

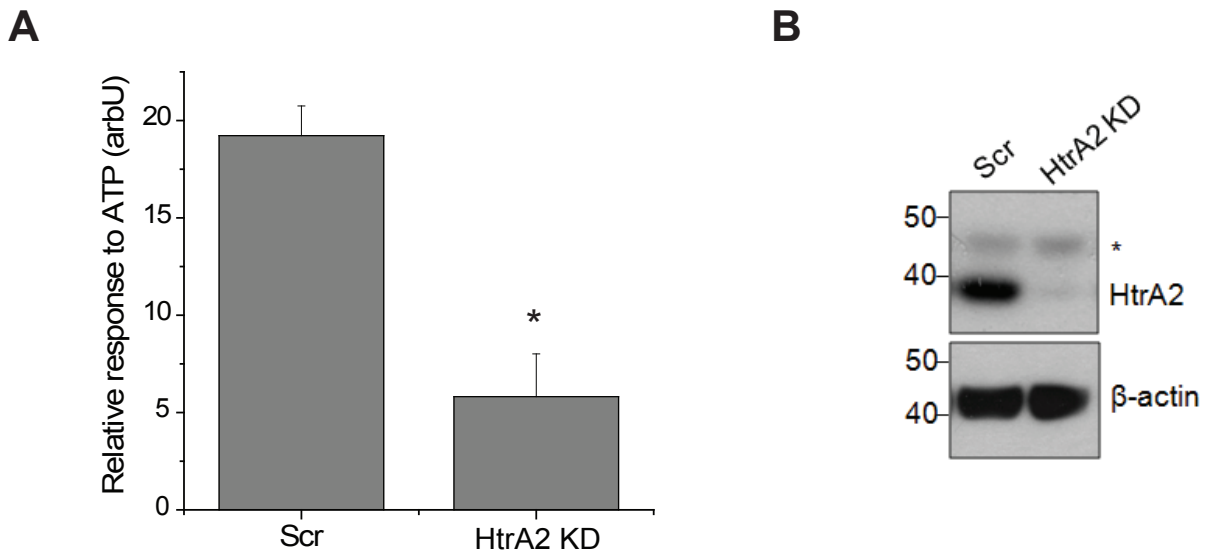

### Supplementary figure 1: ATP production by the ATP synthase is reduced in HtrA2 knockdown SH-SY5Y cells

(A) ATP production was measured in HtrA2 knockdown (KD) cells or in cells transduced with a non-targeting control (Scr). Luminescence traces were normalised such that initial background luminescence was set to zero and response to 10  $\mu$ M luciferin was set to 1 (see fig 5a). Maximal luminescence in response to 1 mM ATP was then quantified for at least three traces per cell line.

(B) Western blot showing knockdown of HtrA2. \* indicates a non-specific band.
