# Supplementary material for: HtrA2 deficiency causes mitochondrial uncoupling through the F1F0-ATP synthase and consequent ATP depletion
Source: PubMed Central journal article supplement — Cell Death Dis. 2012 Jun 28;3(6):e335–. doi: 10.1038/cddis.2012.77 (PMC3388244; doi:10.1038/cddis.2012.77), 2012-06-28
Supplement: cddis201277x2.pdf [file cddis201277x2.pdf]

## Supplementary figure 2

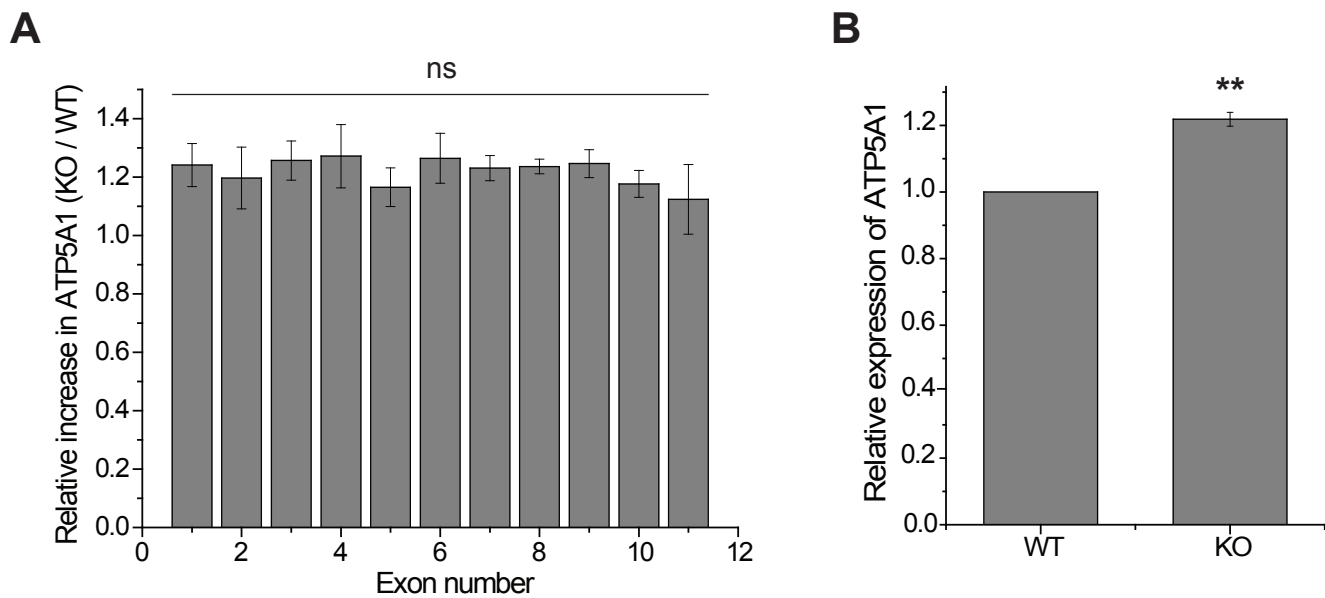

### Supplementary figure 2: Quantitative PCR reveals an increase in expression of ATP5A1 in HtrA2 KO brain compared to WT across all exons of the gene.

(A) Relative expression of each exon of ATP5A1 was measured by qPCR in WT and HtrA2 KO brain. The fold difference between WT and KO (KO/WT) expression was then quantified for each exon. One way ANOVA revealed no significant difference between the exons ( $p=0.95$ )

(B) Across all exons, ATP5A1 expression is significantly increased in HtrA2 KO brain compared to WT.
